# Supplementary material for: STIM1 is a metabolic checkpoint regulating the invasion and metastasis of hepatocellular carcinoma
Source: PubMed Central journal article supplement (PMC7255033; doi:10.7150/thno.44025), 2020-05-16
Supplement: thnov10p6483s1.pdf [file thnov10p6483s1.pdf]

1 **Supplementary Materials**  
 2 **Supplementary Figures**

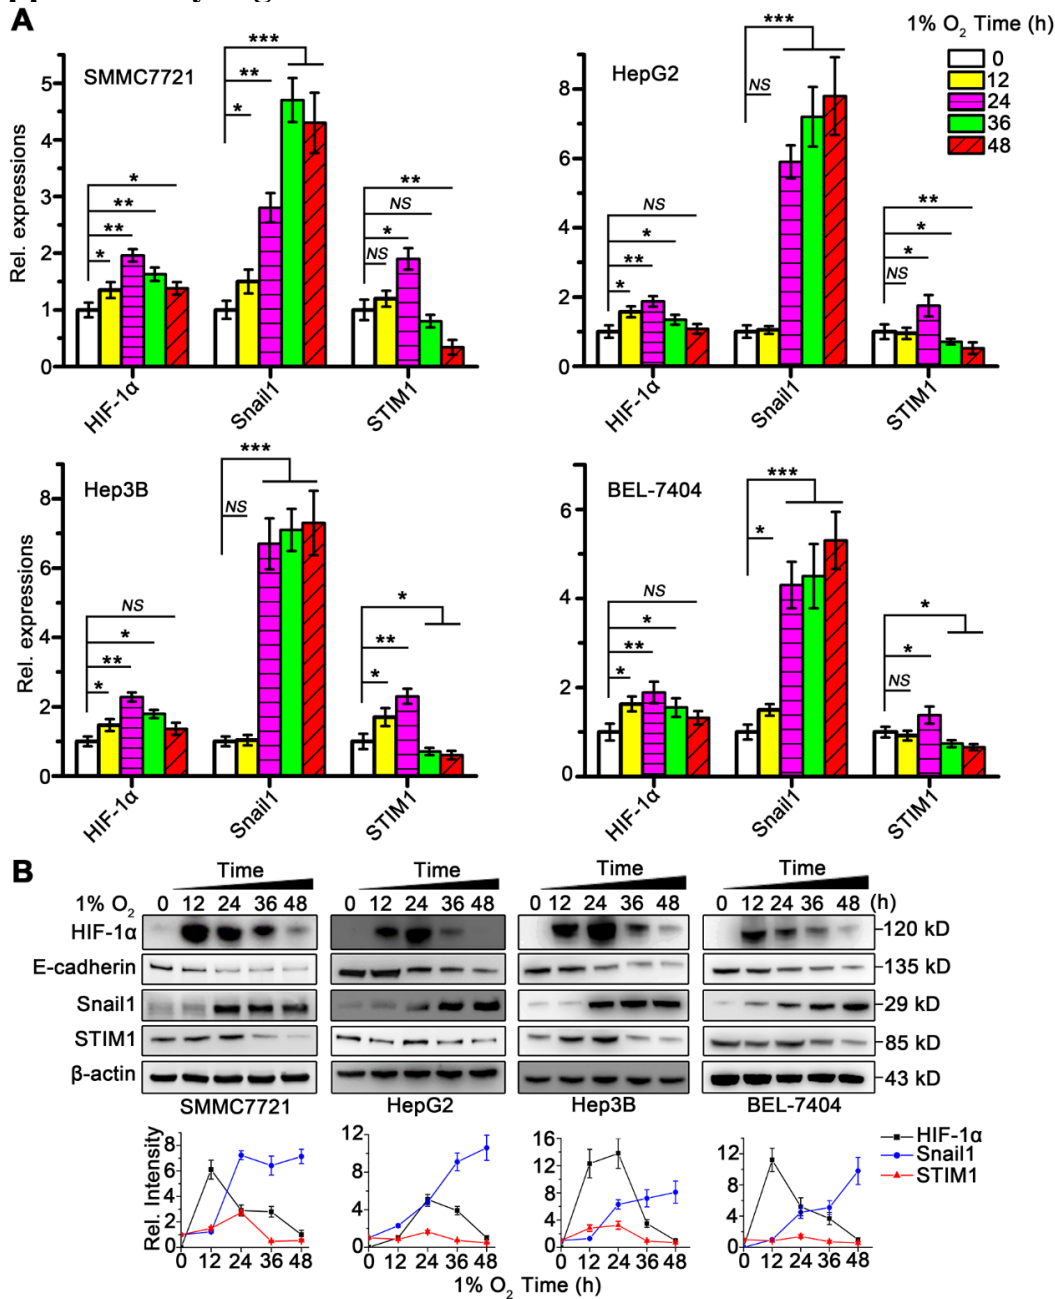

3  
 4 **Figure S1. The expressions of STIM1, HIF-1α and Snail1 are temporally and**  
 5 **differentially regulated in HCC cells under hypoxia treatment.**  
 6 (A) The mRNA levels of HIF-1α, Snail1 and STIM1, (B) the protein expressions of HIF-1α,  
 7 E-cadherin, Snail1 and STIM1 were detected in SMMC7721, HepG2, Hep3B and BEL-7404  
 8 cells cultured in hypoxic condition (1% O<sub>2</sub>) with different time intervals. The results were  
 9 analyzed and normalized against the expression under normoxia. Data are expressed as mean  
 10 ± SEM (n = 3). \**p* < 0.05, \*\**p* < 0.01, \*\*\**p* < 0.001, NS represents no significant difference.

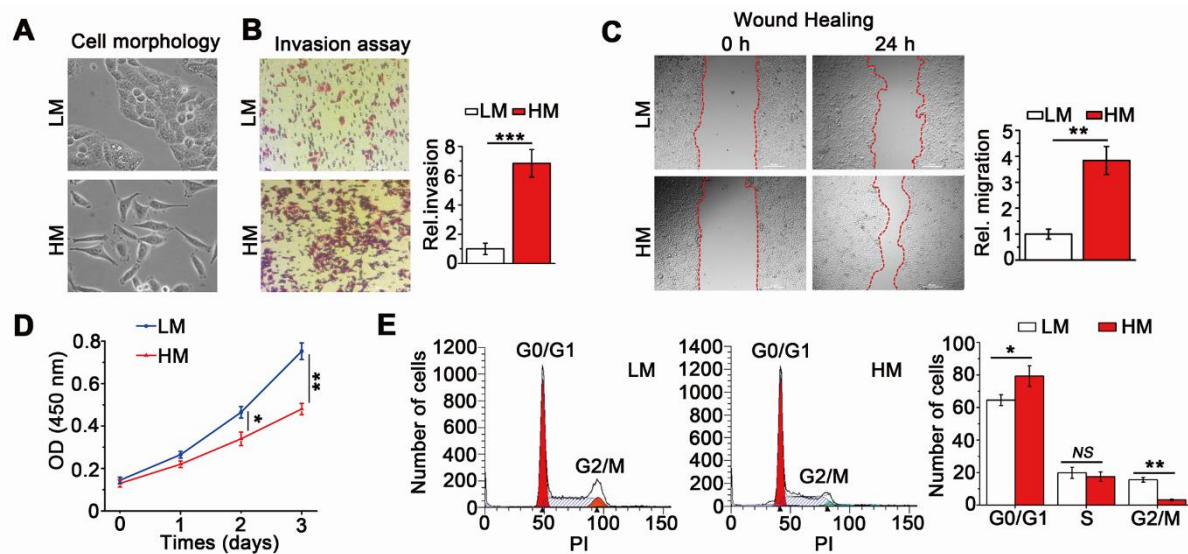

11

12 **Figure S2. HM-SMMC7721 subline displays higher metastatic and lower proliferative**  
 13 **activity.**

14 (A–C) The morphology (A), transwell assay (B) and wound-healing assay (C) were applied to  
 15 evaluate the metastatic activities of HM- and LM-SMMC7721 sublines. (D) CCK-8 assay was  
 16 used to examine proliferation. (E) Propidium iodide (PI)-staining/FACS was performed to  
 17 determine the cell cycle progression of HM- and LM-SMMC7721 sublines. Data are expressed  
 18 as mean  $\pm$  SEM (n = 3). \* $p < 0.05$ , \*\* $p < 0.01$ , \*\*\* $p < 0.001$ , NS represents no significant  
 19 difference.

20

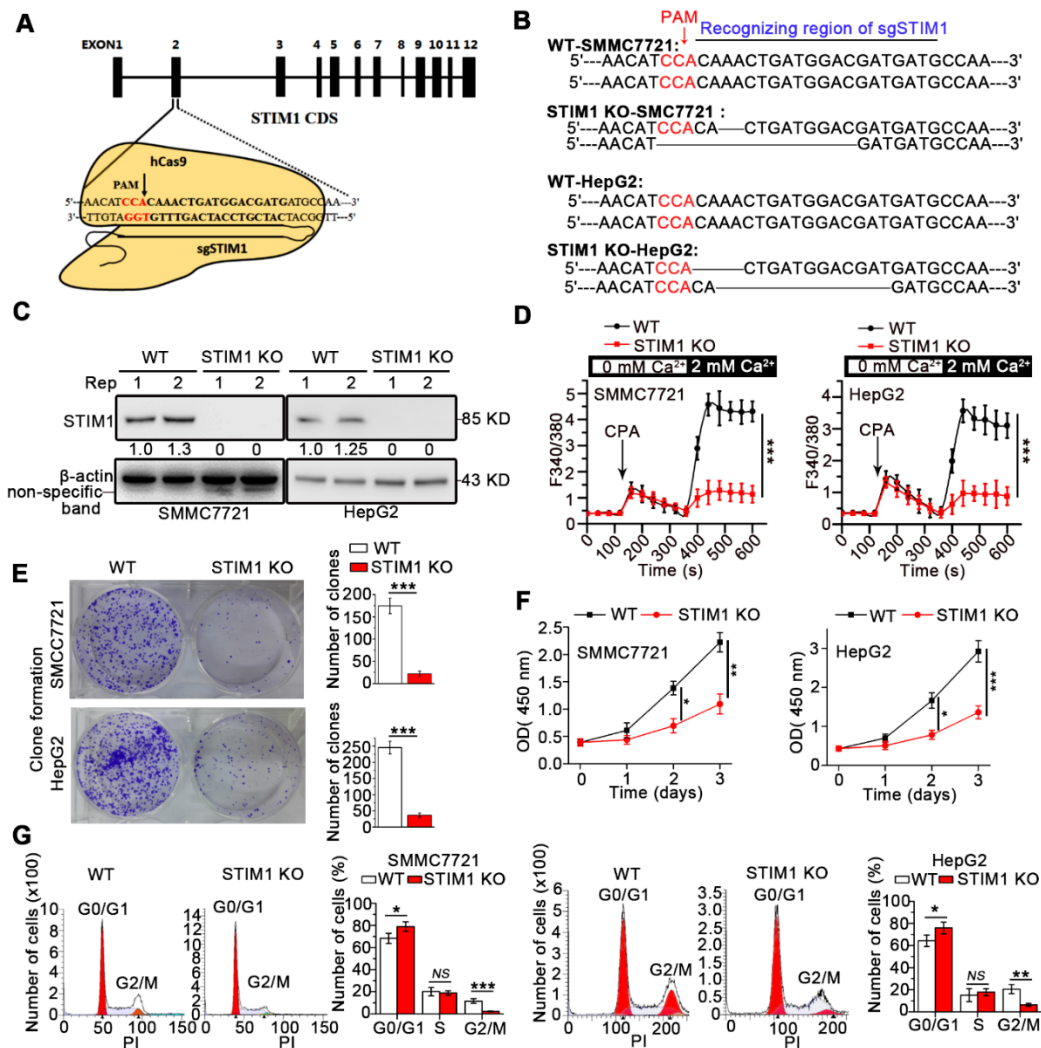

21

22 **Figure S3. Knockout of STIM1 dampens the proliferation of HCC cells.**

23 (A) The Diagram depicts that the nuclease hCas9 recruited by a single guided RNA (sgRNA)  
 24 specifically recognizing a region spanning the STIM1 codon (sgSTIM1) cleaves the *STIM1*  
 25 gene. The vertical arrow showed the potential cleavage site. PAM: protospacer adjacent motif.

26 (B) Sequences of the Cas-9-edited-genome region in STIM1 knockout (KO)-SMMC7721 and  
 27 HepG2 monoclonal cells were analyzed by DNA sequencing, WT: wild type.

28 (C) STIM1 expressions in STIM1 KO-SMMC7721 and HepG2 monoclonal cells were measured by WB.  
 29 (D)  $Ca^{2+}$  mobilization in WT- and STIM1 KO-cells upon cyclopiazonic acid (CPA, 20 mM)  
 30 challenge. The intracellular  $Ca^{2+}$  concentration was expressed as mean  $\pm$  SEM of 8  
 31 independent cells each group.

32 (E-G) STIM1 knockout inhibited proliferation in SMMC7721 cells. Clone formation assay (E),  
 33 CCK-8 assay (F) and PI-staining/FACS measuring cell-cycle (G) were used to evaluate for the  
 34 proliferative characteristics of STIM1 KO-cells. Data are expressed as mean  $\pm$  SEM (n = 3).  
 35 \* $p < 0.05$ , \*\* $p < 0.01$ , \*\*\* $p < 0.001$ , NS represents no significant difference.

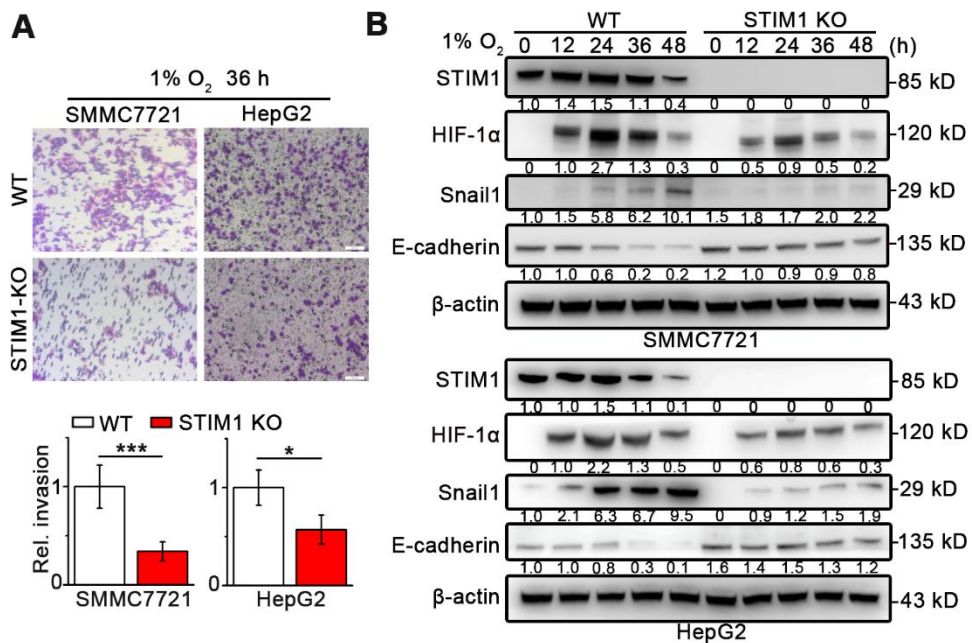

36

37 **Figure S4. Deletion of STIM1 attenuates hypoxia-induced invasion and Snail1 expression.**

38 (A) Transwell assays were applied to evaluate invasion capabilities in WT- and STIM1 KO-

39 SMMC7721 or HepG2 cells under hypoxia. (B) STIM1, HIF-1 $\alpha$ , Snail1 and E-cadherin

40 protein levels were measured in WT- and STIM1 KO-SMMC7721 or HepG2 cells cultured in

41 hypoxia condition (1% O<sub>2</sub>) with different time intervals. Data are expressed as mean  $\pm$  SEM

42 (n = 3). \**p* < 0.05, \*\*\**p* < 0.001.

43

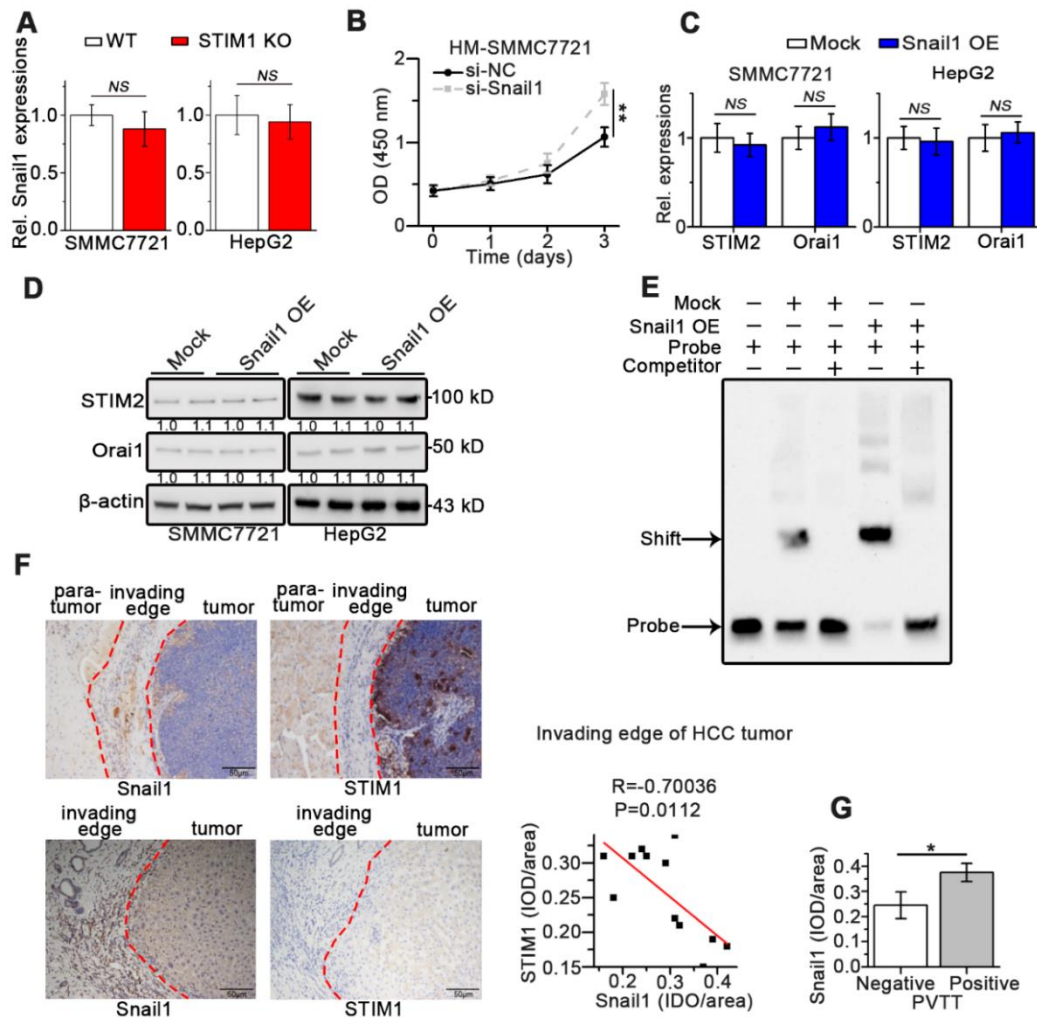

44

45 **Figure S5. The interaction between STIM1 and Snail1 in HCC.**

46 (A) Snail1 mRNA expressions in WT- and STIM1 KO-SMMC7721 or HepG2 cells. (B) The

47 proliferation of HM-SMMC7721 subline transfected with si-NC or si-Snail1. (C, D) RT-qPCR

48 (C) and WB (D) were used to assess STIM2 and Orai1 expressions in mock- and Snail1 OE-

49 SMMC7721 and HepG2 cells. (E) EMSA assay was applied to detect the binding with Snail1

50 and *STIM1* promoter. Nuclear extracts prepared from mock- or STIM1 OE-SMMC7721 cells

51 were incubated with the biotin-labeled probe corresponding to the E-box region in *STIM1*

52 promoter, 100-fold excess of unlabeled probe was used as competitor, band shifts and free

53 probes are indicated with black arrows. (F) Representative micrographs (400 $\times$ ) of

54 immunohistochemical analysis STIM1 and Snail1 in tumor invading-edge from 12 HCC

55 patients, and statistical analysis correlation between the IOD of Snail1 and STIM1 against IgG

56 in the tumor invading-edge. (G) IOD of Snail1 against IgG in the tumor invading-edge of

57 PVTT positive (n = 4) and PVTT negative (n = 8) HCC samples. Data are expressed as mean

58  $\pm$  SEM (n = 3). \* $p$  < 0.05, \*\* $p$  < 0.01, NS represents no significant difference.



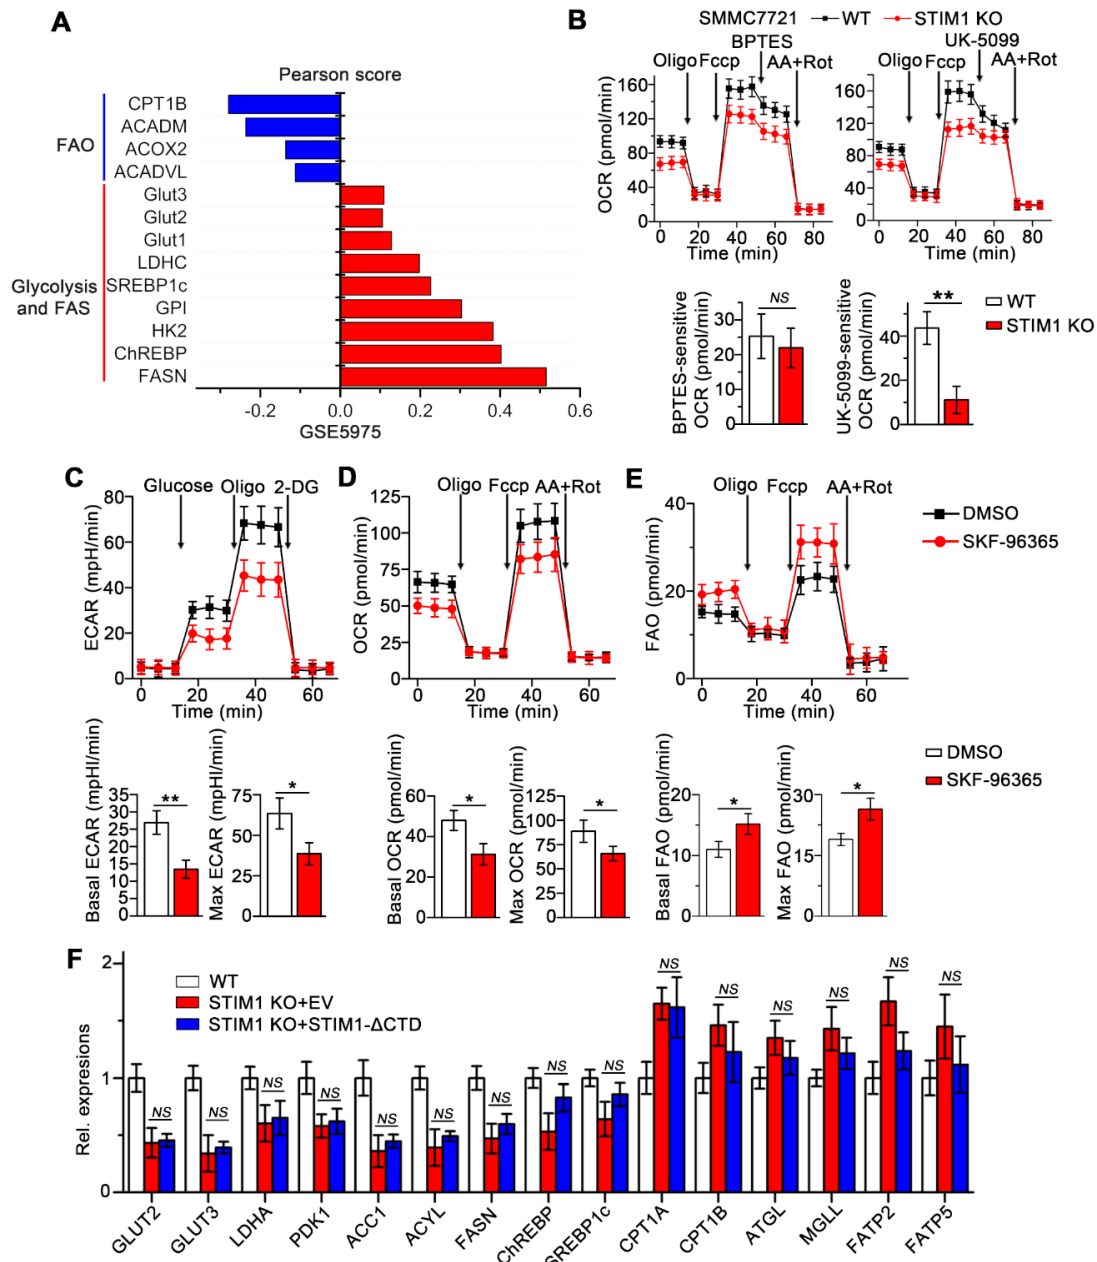

59

60 **Figure S6. STIM1 programs metabolism in HCC cells via SOCE.**

61 (A) Pearson correlation coefficient analysis was performed to determine the correlation  
 62 between STIM1 and selected metabolic related genes (Pearson's correlation coefficient > 0.1  
 63 or < -0.1, \* $p < 0.05$ ), microarray data was obtained from GSE5975. (B) Effects of BPTES (10  
 64  $\mu\text{M}$ ) or UK-5099 (150  $\mu\text{M}$ ) on OCR of WT- or STIM1 KO-SMMC7721 cells. (C-E) ECAR  
 65 (C), OCR (D), FAO (E) caused by SFK-96365 (5  $\mu\text{M}$ ) treatment in SMMC7721 cells. (F)  
 66 Indicated gene expressions in WT-, STIM1 KO+EV-, and STIM1 KO+STIM1- $\Delta\text{CTD}$ -  
 67 SMMC7721 cells. Data are expressed as mean  $\pm$  SEM (n = 3). \* $p < 0.05$ , \*\* $p < 0.01$ , NS  
 68 represents no significant difference.

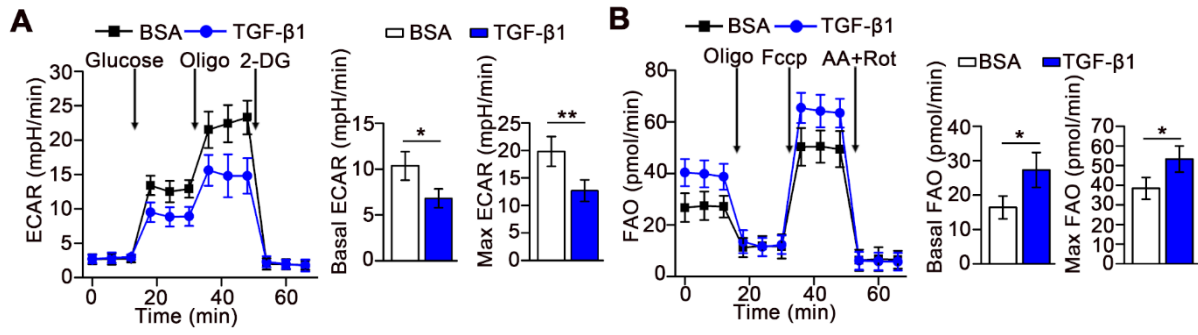

69

70 **Figure S7. Metabolic switch triggered by TGF-β1 in SMMC7721 cells.**

71 (A, B) ECAR (A) and FAO (B) of SMMC7721 cells after treated with TGF-β1 (20 ng/mL) for  
 72 48 h, and the BSA-treated group was used as control. Data are expressed as mean ± SEM (n =  
 73 3). \* $p < 0.05$ , \*\* $p < 0.01$ .

74

75 **Supplementary Tables**

76

77 **Table S1. Clinicopathological characteristics of 12 HCC patients.**

| Patient No. | Age | Sex | Tumor Size(cm*cm*cm) | Procedure          | Edmondson Grade | TNG Stage | Cirrhosis | HBsAg    | PVTT     |
|-------------|-----|-----|----------------------|--------------------|-----------------|-----------|-----------|----------|----------|
| 1           | 53  | M   | 2.5*2*2.5            | Surgical resection | I               | T1 N0 M0  | No        | Negative | Negative |
| 2           | 47  | F   | 3*3.5*4              | Surgical resection | II              | T1 N0 M0  | No        | Negative | Positive |
| 3           | 61  | F   | 1.5*2*3              | Surgical resection | I               | T1 N0 M0  | Yes       | Positive | Negative |
| 4           | 54  | M   | 3*3.5*5              | Surgical resection | II              | T1 N0 M0  | No        | Positive | Positive |
| 5           | 43  | F   | 5*1.5*4              | Surgical resection | II              | T1 N0 M0  | Yes       | Positive | Negative |
| 6           | 62  | M   | 3.5*2.5*5            | Surgical resection | II              | T1 N0 M0  | Yes       | Negative | Positive |
| 7           | 57  | M   | 5*3*6.5              | Surgical resection | III             | T1 N0 M0  | No        | Positive | Negative |
| 8           | 47  | F   | 3.5*4.3*5            | Surgical resection | III             | T1 N0 M0  | No        | Positive | Negative |
| 9           | 53  | M   | 2.5*3*4              | Surgical resection | I               | T1 N0 M0  | No        | Negative | Negative |
| 10          | 58  | M   | 5*7.5*9              | Surgical resection | II              | T1 N0 M0  | Yes       | Positive | Negative |
| 11          | 61  | M   | 1.5*2*3.5            | Surgical resection | II              | T1 N0 M0  | No        | Positive | Positive |
| 12          | 57  | F   | 2*3.5*5              | Surgical resection | III             | T1 N0 M0  | Yes       | Negative | Negative |

78



79 **Table S2. Primers for RT-qPCR.**

| Gene            | Species      | Accession    | Sequence of forward primer | Sequence of reverse primer |
|-----------------|--------------|--------------|----------------------------|----------------------------|
| <i>STIM1</i>    | Homo sapiens | NM_003156    | TTGTCCATGCAGTCCCCTAG       | GGTAGTGGTGATGGTGGTGA       |
| <i>STIM2</i>    | Homo sapiens | NM_001169117 | AGACAACAATGTCAAAGGAACGA    | ACTCCGGTCACTGATTTTCAAC     |
| <i>ORAI1</i>    | Homo sapiens | NM_032790    | GGACGCTGACCACGACTAC        | GGGACTCCTTGACCGAGTT        |
| <i>SNAI1</i>    | Homo sapiens | NM_005985    | ACTGCAACAAGGAATACCTCAG     | GCACTGGTACTTCTTGACATCTG    |
| <i>SLUG</i>     | Homo sapiens | NM_003068    | CGAACTGGACACACATACAGTG     | CTGAGGATCTCTGGTTGTGGT      |
| <i>CDH1</i>     | Homo sapiens | NM_004360    | GCACCTTCCATGACAGACCC       | GAGAACGCATTGCCACATACAC     |
| <i>GLUT1</i>    | Homo sapiens | NM_006516    | CTCATCGCCAGGTGTTT          | TTCTCCTCGTTGCGGTTG         |
| <i>GLUT2</i>    | Homo sapiens | NM_000340    | GGGCAATTATGATCTGTGGCA      | TTCTGCTCACTCGATGCTTCT      |
| <i>GLUT3</i>    | Homo sapiens | NM_006931    | GCTGGGCATCGTTGTTGGA        | GCACTTTGTAGGATAGCAGGAAG    |
| <i>GLUT4</i>    | Homo sapiens | NM_001042    | TGGCGGCATGATTTCCCTC        | GCCAGGACATTGTTGACCAG       |
| <i>HK2</i>      | Homo sapiens | NM_000189    | GGCTTGGAGCCACCCTCACC       | CCTTCTGGAGCCATTGTCCGT      |
| <i>HK3</i>      | Homo sapiens | NM_002115    | GTGAGGTTGGGCTAGTTGTAGA     | GTCCAGGGTATGGTCTGAAGGT     |
| <i>LDHA</i>     | Homo sapiens | NM_001165415 | TTGACCTACGTGGCTTGGAAAG     | GGTAACGGAATCGGGCTGAAT      |
| <i>LDHB</i>     | Homo sapiens | NM_002300    | TCTGTGACCGCCAATTCATAAG     | GCACCAGATTGAGCCGACTC       |
| <i>LDHC</i>     | Homo sapiens | NM_002301    | AGAACATGGTGATTCTAGTGTGC    | ACAGTCCAATAGCCCAAGAGG      |
| <i>PKD1</i>     | Homo sapiens | NM_002610    | GAGAGCCACTATGGAACACCA      | GGAGGTCTCAACACGAGGT        |
| <i>PKM2</i>     | Homo sapiens | NM_182471    | ATGTCGAAGCCCATAGTGAA       | TGGGTGGTGAATCAATGTCCA      |
| <i>PFKL</i>     | Homo sapiens | NM_002626    | GCTGGGCGGCATATCATT         | TCAGGTGCGAGTAGGTCCG        |
| <i>PGAM1</i>    | Homo sapiens | NM_002629    | TCTGGAGGCGCTCCTATGAT       | TCTGTGAGGTCTGCATACCTG      |
| <i>PGK1</i>     | Homo sapiens | NM_000291    | GACCTAATGTCCAAGCTGAGAA     | CAGCAGGTATGCCCAAGACC       |
| <i>GPI</i>      | Homo sapiens | NM_001184722 | CAAGGACCCTTCAACCACTT       | CCAGGATGGGTGTGTTTGACC      |
| <i>ENO1</i>     | Homo sapiens | NM_001201483 | TGGTGTCTATCGAAGATCCCTT     | CCTTGGCGATCCTCTTTGG        |
| <i>ALDOA</i>    | Homo sapiens | NM_000034    | ATGCCCTACCAATATCCAGCA      | GCTCCCAGTGGACTCATCTG       |
| <i>TPI</i>      | Homo sapiens | NM_000365    | CTCATCGGCACTCTGAACG        | GCGAAGTCGATATAGGCATAGG     |
| <i>FH</i>       | Homo sapiens | NM_000143    | CCTGTGCATCCCAACGATCAT      | AATTCTGCCCAAGAGTAAGTG      |
| <i>CS</i>       | Homo sapiens | NM_004077    | GGTGGCATGAGAGGCATGAA       | TAGCCTTGGGTAGCAGTTTCT      |
| <i>SDH1</i>     | Homo sapiens | NM_003000    | GGTGGCACAGTCAGCCTCGT       | GGAGACCTAAAGCACCTGAAGACG   |
| <i>CD36</i>     | Homo sapiens | NM_000072    | AAGCCAGGTATTGCAGTTCTTT     | GCATTTGCTGATGCTAGCACA      |
| <i>FABP1</i>    | Homo sapiens | NM_001443    | AAGACAGTGTTTCAAGTTGGAAG    | TGAGTTCGGTTCACAGACTTGAT    |
| <i>FATP2</i>    | Homo sapiens | NM_003645    | TACTCTTGCCTTGGCGACTAA      | CCGAAGCAGTTACCCGATATAC     |
| <i>FATP5</i>    | Homo sapiens | NM_012254    | CATGGCGTGACAGTGATCCT       | CAGCCCGTAGTCCATTGCC        |
| <i>LDLR</i>     | Homo sapiens | NM_000527    | ACGGCGTCTCTTCTATGACA       | CCCTTGGTATCCGCAACAGA       |
| <i>VLDLR</i>    | Homo sapiens | NM_003383    | CTGGGTATGCGACGATGATG       | CTTGGTGTGATGACTGGCTG       |
| <i>ACC1</i>     | Homo sapiens | NM_000664    | ACCACCAATGCCAAAGTAGC       | CTGCAGTTCTCAATGCAAA        |
| <i>ACYL</i>     | Homo sapiens | NM_001096    | CAGCATCGAACTTTCAC          | TGGTCTTCCCAGACTTCTC        |
| <i>FASN</i>     | Homo sapiens | NM_004104    | CAAAGAAGCCATCTCCCG         | GCTGTCCACGAACTCAAACA       |
| <i>SCD</i>      | Homo sapiens | NM_005063    | GCCCCTCTACTTGAAGACGA       | AAGTGATCCCATACAGGGCTC      |
| <i>CPT1A</i>    | Homo sapiens | NM_001031847 | ATCAATCGGACTCTGAAACGG      | TCAGGGAGTAGCGCATGGT        |
| <i>CPT1B</i>    | Homo sapiens | NM_152246    | ATCATGGCGTGGATGATGT        | CCTCTCATGGTGAACAGCAA       |
| <i>ACADVL</i>   | Homo sapiens | NM_000018    | ACGGGCGTACTGGGTGTT         | ATGGTGGAGGAGACCCTTG        |
| <i>LACD</i>     | Homo sapiens | NM_001608    | TGCAATAGCAATGACAGAGCC      | CGCAACTACAATCACAACATCAC    |
| <i>MCAD</i>     | Homo sapiens | NM_000016    | CGCAACTACAATCACAACATCAC    | AGCTCCGTCAACCAATAAAACAT    |
| <i>HSL</i>      | Homo sapiens | NM_005357    | GAAGGCTATGTTGTCCTCCG       | ATGAGAAAACCAAGTGTCTCGG     |
| <i>ATGL</i>     | Homo sapiens | NM_020376    | ACCTCAATGAACCTTGGCACC      | CAACGCCACGCACATCTA         |
| <i>MGLL</i>     | Homo sapiens | NM_001003794 | AATGCAGACGGACAGTACCTC      | GAGCCAGCTTTCATAGCGG        |
| <i>UCP2</i>     | Homo sapiens | NM_003355    | TACGTCCAGGAGATGGAGA        | CCGTGAGACCTTACAAGCC        |
| <i>ACOX1</i>    | Homo sapiens | NM_007292    | GAAACTCACCTTCGAGGCTTG      | TTCCCTTAGTGATGAGCTGG       |
| <i>NDUFA</i>    | Homo sapiens | NM_004541    | GCGTACATCCACAGGTTCACT      | GCGCCTATCTCTTCCATCAGA      |
| <i>UQCRC1</i>   | Homo sapiens | NM_003365    | GGGGCACAAGTGCTATTGC        | GTTGTCCAGCAGGCTAACC        |
| <i>HMGR</i>     | Homo sapiens | NM_000859    | TTCTTGCCAACACTTTCGTGTT     | GCTGCCAATTGGACGACC         |
| <i>SREBP1c</i>  | Homo sapiens | NM_004176    | ACAGTGACTTCCCTGGCCTAT      | GCATGGACGGGTACATCTCAA      |
| <i>ChREBP</i>   | Homo sapiens | NM_032951    | CGACCCACACTCACACGCC        | GCCACACACGGGGCTCTTCC       |
| <i>PPARA</i>    | Homo sapiens | NM_005036    | AGAGTGGGCTTTCGTGTC         | GCCGCCTTCAGGTACAGTAG       |
| <i>PPARG</i>    | Homo sapiens | NM_005037    | GGGATCAGCTCCGTGGATCT       | TGCACTTTGGTACTCTTGAAGTT    |
| <i>PPARGC1A</i> | Homo sapiens | NM_013261    | CTGCGGGATGGAGACAG          | TTCGTTTGACCTGCGCAAAG       |
| <i>ACTB</i>     | Homo sapiens | NM_001101    | GCGCGGCTACAGTTCATCA        | CTTAATGTCACGCACGATTTCC     |

80

81

82 **Table S3. Antibody used for WB, ChIP and IHC.**

83

| Antibodies                        | Source                    | Identifier                     |
|-----------------------------------|---------------------------|--------------------------------|
| STIM1 (for WB and IHC)            | Cell Signaling Technology | Ca# 5668, RRID:AB_10828699     |
| E-cadherin                        | Cell Signaling Technology | Cat# 3195, RRID:AB_2291471     |
| Snail1 (for WB, ChIP and EMSA)    | Cell Signaling Technology | Cat# 3879, RRID:AB_2255011     |
| HIF-1 $\alpha$                    | Cell Signaling Technology | Cat# 36169, RRID:AB_2799095    |
| p-CaMKII (Thr286)                 | Cell Signaling Technology | Cat# 12716, RRID:AB_271388     |
| HK2                               | Cell Signaling Technology | Cat# 2106, RRID:AB_823520      |
| LDHA                              | Cell Signaling Technology | Cat# 3582, RRID:AB_2066887     |
| CPT1 $\alpha$                     | Cell Signaling Technology | Ca# 12252                      |
| AMPK and ACC Antibody Sampler Kit | Cell Signaling Technology | Cat# 9957, RRID:AB_823677      |
| p-LKB1                            | Cell Signaling Technology | Cat# 3482, RRID:AB_2198321     |
| LKB1                              | Cell Signaling Technology | Cat# 3047, RRID:AB_2198327     |
| GSK-3 Antibody Sampler Kit        | Cell Signaling Technology | Cat# 9369, RRID:AB_1196648     |
| PKM2                              | Cell Signaling Technology | Cat# 4053, RRID:AB_1904096     |
| PFKL                              | Cell Signaling Technology | Cat# 8164, RRID:AB_2713957     |
| PPAR $\gamma$                     | Cell Signaling Technology | Cat# 2443, RRID:AB_823598      |
| AKT                               | Cell Signaling Technology | Cat# 9272, RRID:AB_329827      |
| p-AKT                             | Cell Signaling Technology | Cat# 9271, RRID:AB_329825      |
| FASN                              | Cell Signaling Technology | Ca# 3180                       |
| Ubiquitin                         | Cell Signaling Technology | Ca# 3936                       |
| Rabbit IgG (for ChIP and IHC)     | Cell Signaling Technology | Ca# 3900                       |
| Glut3                             | Abcam                     | Cat# ab41525, RRID:AB_732609   |
| STIM2                             | Abcam                     | Cat# ab59342, RRID:AB_945663   |
| Orail                             | Abcam                     | Ca#: ab244352                  |
| ChREBP                            | Abcam                     | Cat# ab92809, RRID:AB_10562135 |
| PPAR- $\alpha$                    | Abcam                     | Cat# ab24509, RRID:AB_448110   |
| SREBP1c                           | Abcam                     | Cat# ab28481, RRID:AB_778069   |
| Snail1<br>(for IHC)               | Santa Cruz Biotechnology  | Cat# 393172                    |
| $\beta$ -actin                    | Beyotime                  | Cat# AF1681                    |

84
